# Supplementary material for: 22072 軸組構法住宅の耐震性に関する研究 : その3. 仮動的応答実験概要
Source: Springer Nature journal article supplement (doi:10.1007/s13300-018-0468-3), 1998-07-30
Supplement: MOESM1 [file 15897172]

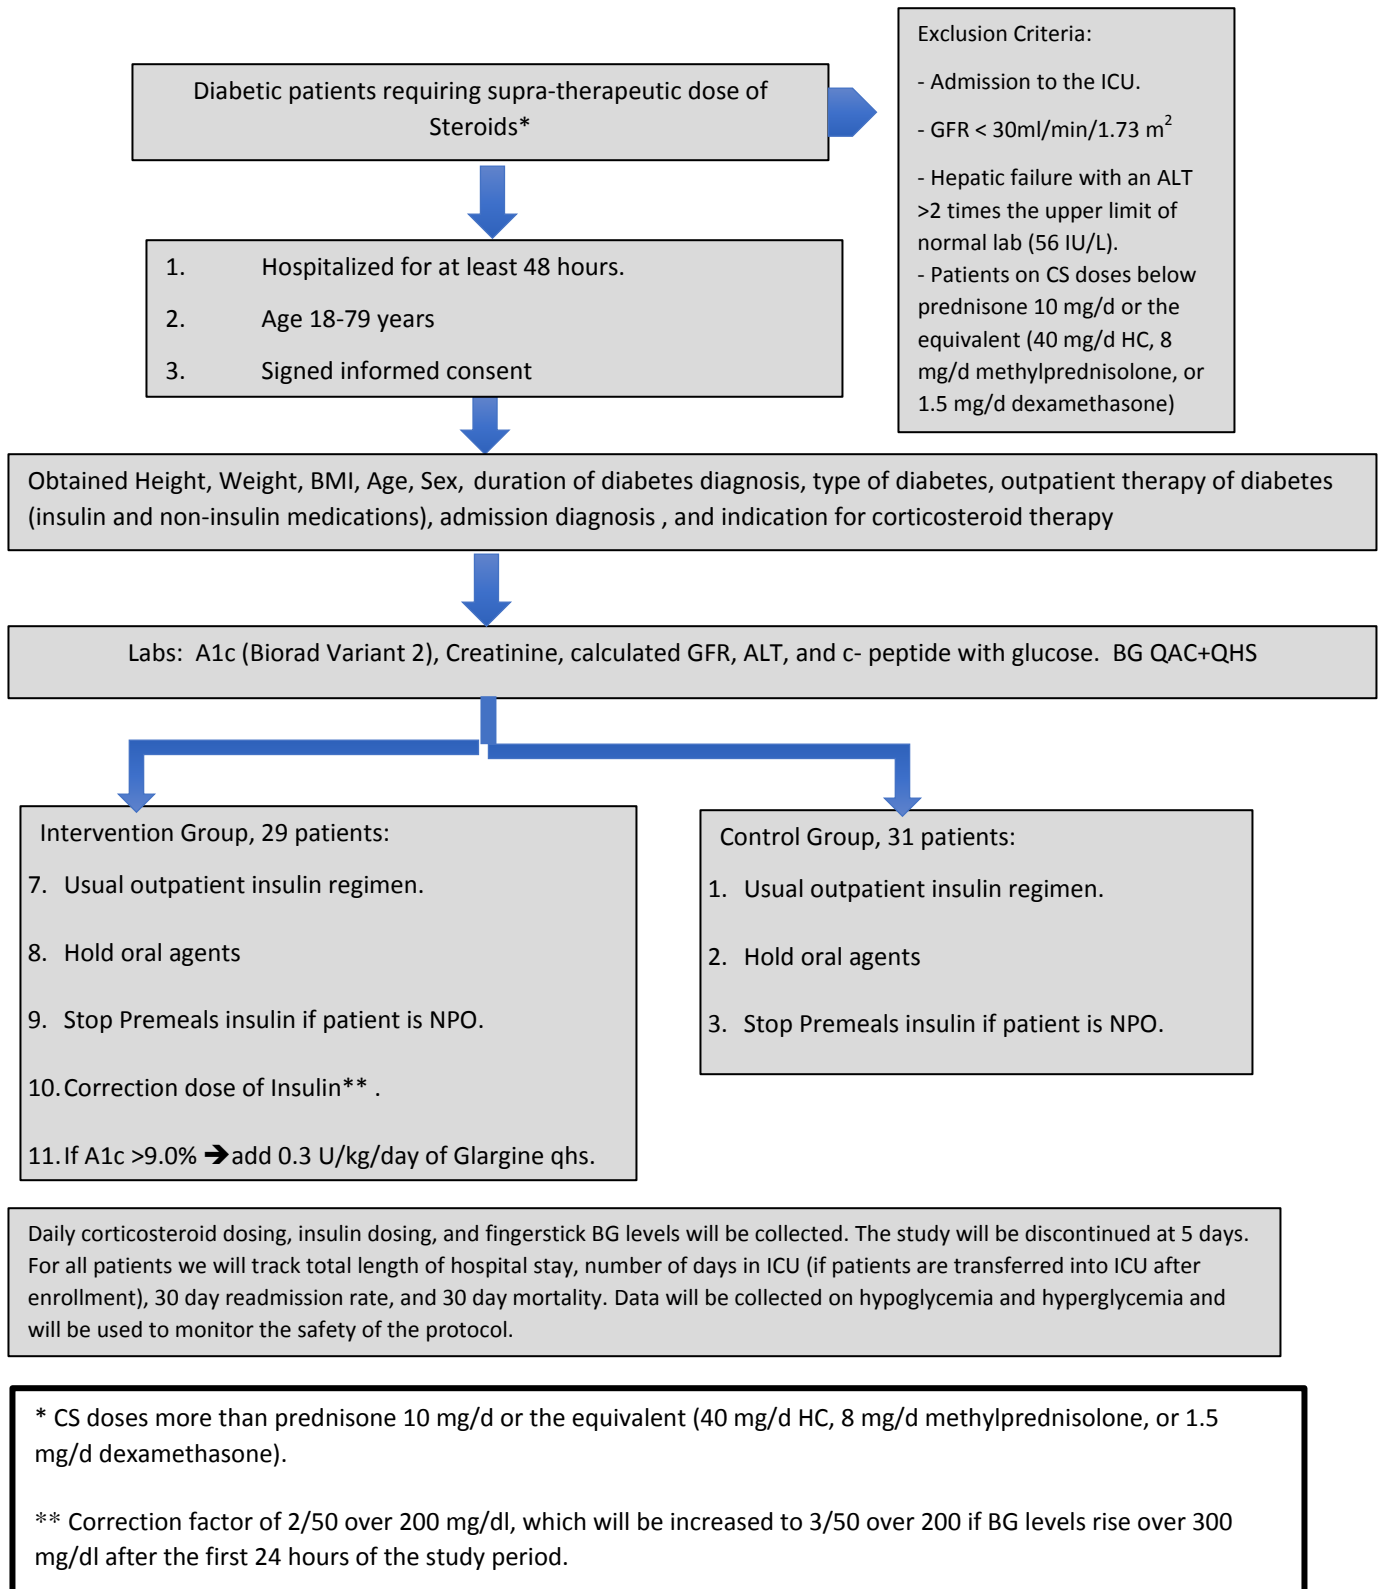

Supplemental Figure 1: Study protocol including inclusion/exclusion criteria, baseline laboratory work up and dose titration.

|                        | Low dose corticosteroid* | High dose corticosteroid** |
|------------------------|--------------------------|----------------------------|
| Eating and 6 am – 8 pm | 0.15 U NPH/kg            | 0.3 U NPH/kg               |
| NPO and 8 pm – 6 am    | 0.1 U NPH/kg             | 0.2 U NPH/kg               |

Supplemental Figure 2: NPH insulin dosing protocol

\* Defined as prednisone between 10 - 40 mg or equivalent doses of hydrocortisone, methylprednisolone and dexamethasone.

\*\* Defined as prednisone 40 mg or more or equivalent doses of hydrocortisone, methylprednisolone and dexamethasone.
